# Supplementary material for: Plant water resource partitioning and isotopic fractionation during transpiration in a seasonally dry tropical climate
Source: Copernicus journal article supplement (doi:10.5194/bg-14-73-2017), 2017-01-06
Supplement: Supplementary file [file bg-14-73-2017-supplement-title-page.pdf › bg-14-73-2017-supplement-title-page.pdf]

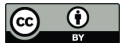

## *Supplement of*

# **Plant water resource partitioning and isotopic fractionation during transpiration in a seasonally dry tropical climate**

**Lien De Wispelaere et al.**

*Correspondence to:* Lien De Wispelaere ([lien.dewispelaere@ugent.be](mailto:lien.dewispelaere@ugent.be))

- [bg-14-73-2017-supplement-title-page.pdf](#)
- [figS01.pdf](#)
- [figS02.pdf](#)

The copyright of individual parts of the supplement might differ from the CC-BY 3.0 licence.
