# Supplementary figures and images for: Plant water resource partitioning and isotopic fractionation during transpiration in a seasonally dry tropical climate
Source: Copernicus journal article supplement (doi:10.5194/bg-14-73-2017), 2017-01-06

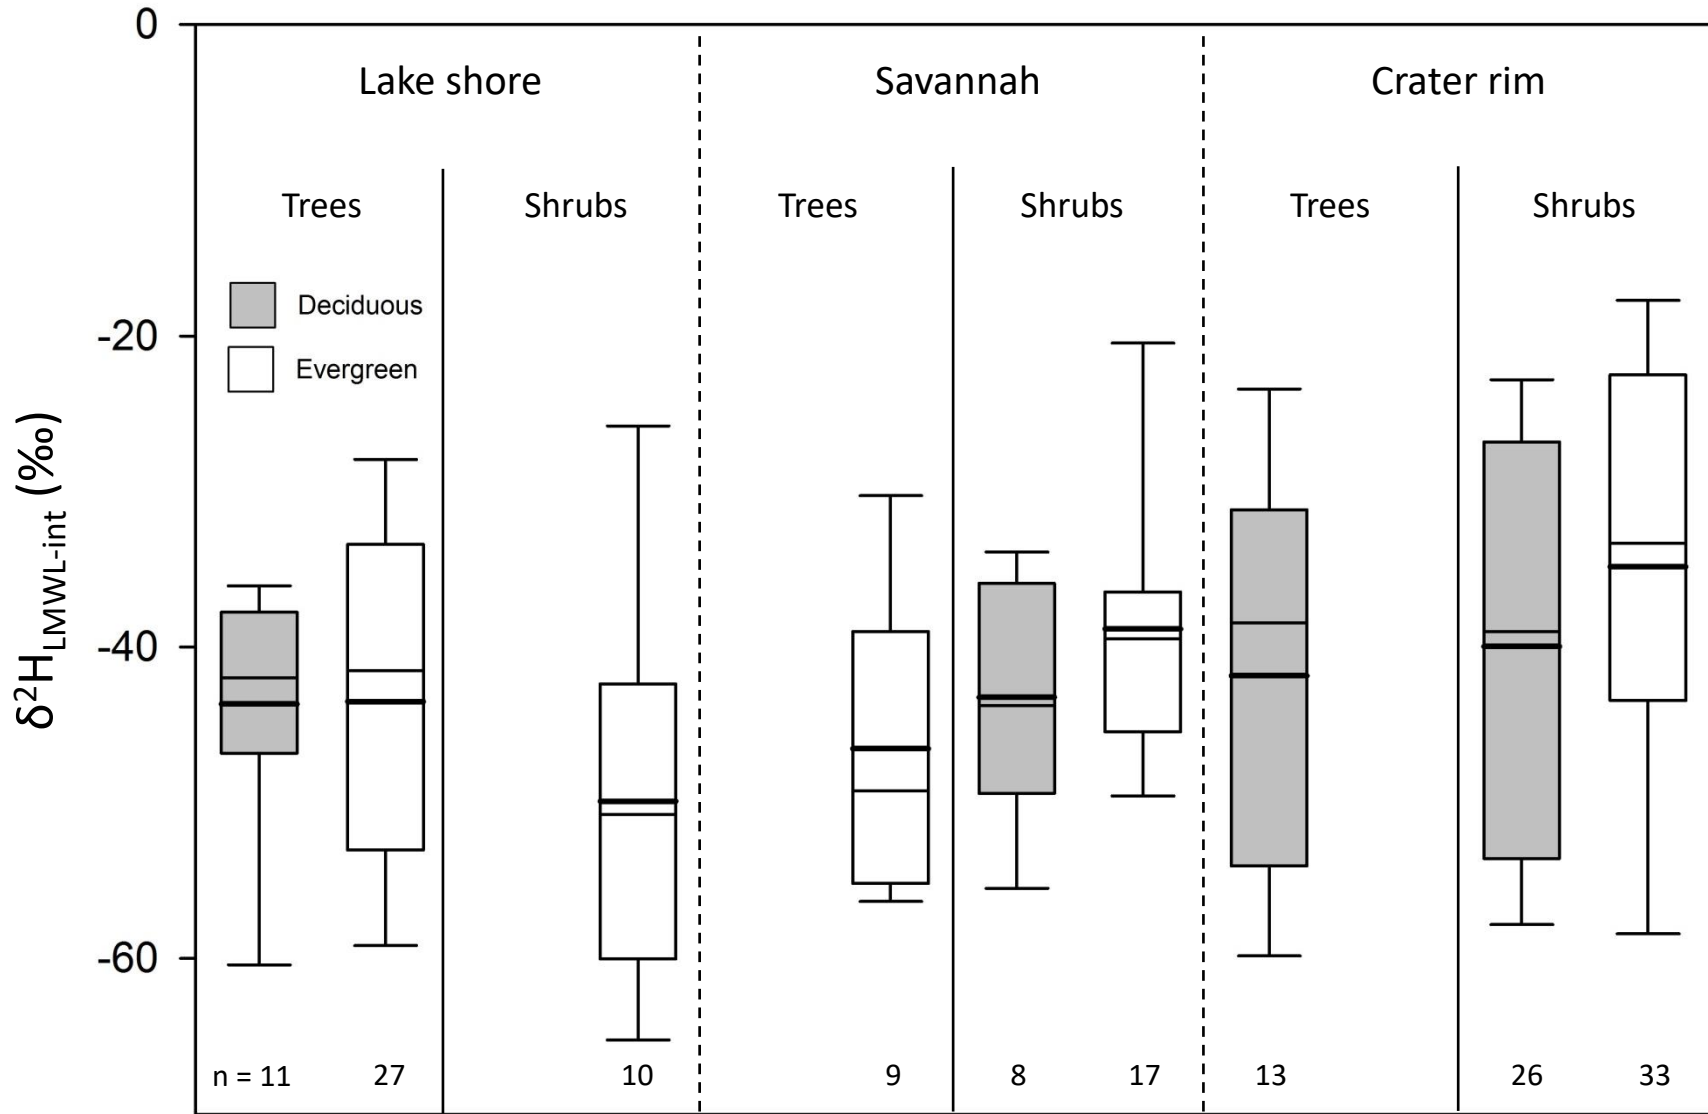

Supplement: Supplementary file 1 [file figS01.pdf › figS01.pdf]

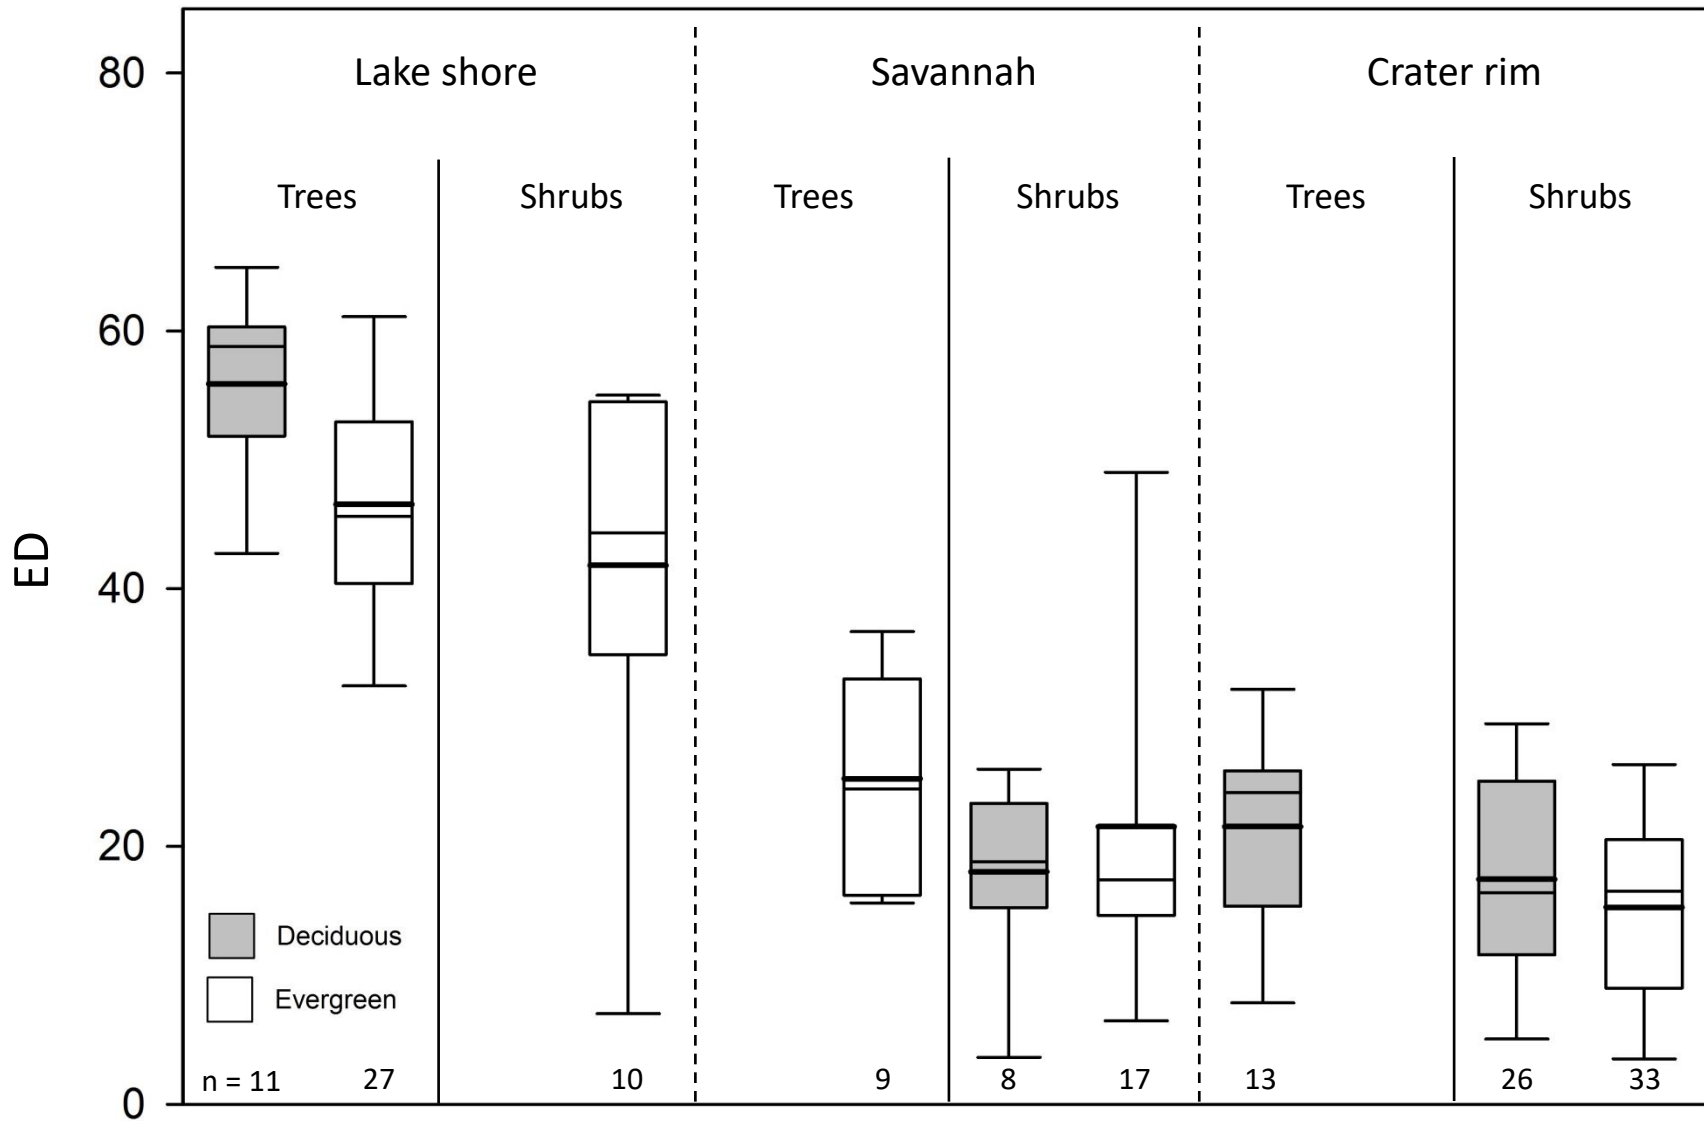

Supplement: Supplementary file 2 [file figS02.pdf › figS02.pdf]
